# Supplementary material
Source: publisher figshare collection journal article supplement (https://gsajournals.figshare.com/articles/dataset/_/14403323)
Supplement: Supplementary file 2 [file 1]

## SUPPLEMENTAL FIGURES AND TABLES

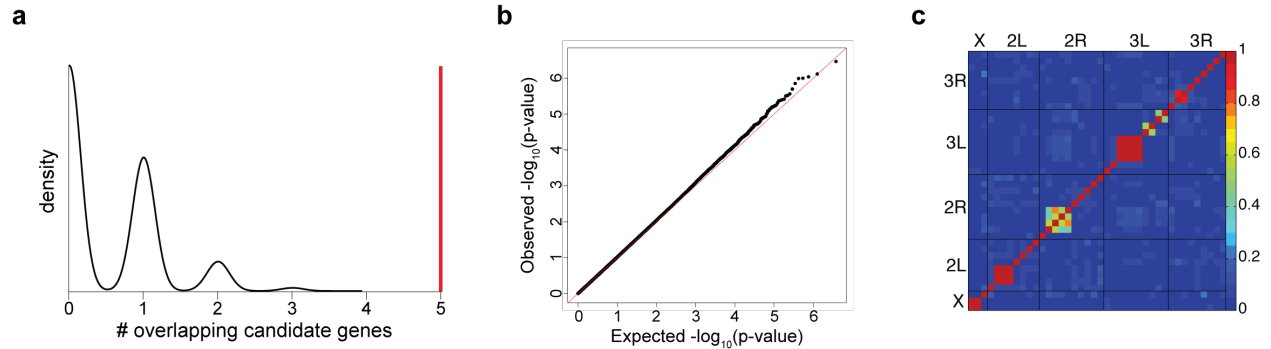

**Figure S1. a)** Bootstrap distribution ( $n = 1000$ ) of the number of overlapping genes between our candidate genes and a random set of candidate genes (black kernel density estimate) vs. the observed number of overlapping genes (red line) between our candidate genes and 552 candidate genes previously associated with fecundity (Durham *et al.* 2014). For each bootstrap sample, a random set of 552 candidate genes was chosen without replacement from a list of genes associated with DGRP variants (annotation based on FlyBase release 5.57). **b)** QQ plot comparing observed and expected  $p$ -values, with the red line showing a 1:1 relationship. **c)** Linkage disequilibrium heat map for all the variants identified ( $p < 1E-4$ ).

**Table S1. Heritability estimates for the means of the four phenotypes.** HPD = highest posterior density.

| Phenotype     | Heritability Estimate | 95% HPD Interval |
|---------------|-----------------------|------------------|
| Mean ♀ Weight | 0.64                  | 0.55 - 0.72      |
| Mean ♂ Weight | 0.73                  | 0.65 - 0.80      |
| Number of ♀   | 0.47                  | 0.37 - 0.57      |
| Number of ♂   | 0.48                  | 0.39 - 0.58      |

**Table S2. Variants significantly associated with offspring number and mass ( $p < 1E-5$ ).**  
Chromosome coordinates represented in dm5 assembly coordinates. MAF = minor allele frequency, Del = deletion, Ins = insertion, and numbers in parentheses represent the number of basepairs to the closest gene.

| Phenotype         | Chr | Pos      | MAF  | Effect | p-value | Gene              | Class              |
|-------------------|-----|----------|------|--------|---------|-------------------|--------------------|
| Number of Females | 2R  | 10148146 | 0.14 | 7.62   | 7.0E-07 | <i>β4GalNAcTA</i> | 3' UTR             |
|                   | 3L  | 18174169 | 0.49 | -5.42  | 8.7E-07 | <i>hid</i>        | Intron             |
|                   | 2R  | 10186017 | 0.13 | 7.43   | 1.9E-06 | <i>lh</i>         | 3' UTR             |
|                   | 3R  | 14116444 | 0.34 | -5.38  | 4.1E-06 | <i>l(3)05822</i>  | Synonymous         |
|                   | 2L  | 3581756  | 0.06 | -9.98  | 2.9E-06 | <i>sob</i>        | Upstream (987bp)   |
|                   | 2R  | 10191983 | 0.06 | 10.46  | 3.2E-06 | —                 | —                  |
|                   | 2L  | 14965948 | 0.18 | -6.49  | 5.3E-06 | <i>CG42313</i>    | Intron             |
|                   | X   | 643776   | 0.13 | 7.08   | 3.6E-06 | <i>CG13362</i>    | 3' UTR             |
|                   | 2R  | 10148180 | 0.17 | 6.40   | 4.1E-06 | <i>β4GalNAcTA</i> | 3' UTR             |
|                   | 2R  | 10146515 | 0.14 | 6.85   | 5.4E-06 | <i>β4GalNAcTA</i> | Upstream (22bp)    |
|                   | X   | 641893   | 0.13 | 6.98   | 4.9E-06 | <i>sdk</i>        | 3' UTR             |
|                   | 2R  | 10185376 | 0.07 | 9.29   | 4.6E-06 | <i>lh</i>         | Intron             |
|                   | X   | 641442   | 0.15 | 6.66   | 5.3E-06 | <i>sdk</i>        | Non-synonymous     |
|                   | X   | 631854   | 0.10 | 7.87   | 7.5E-06 | <i>sdk</i>        | Intron             |
|                   | 3R  | 14116456 | 0.34 | -5.15  | 1.1E-05 | <i>l(3)05822</i>  | Synonymous         |
|                   | 3R  | 14149420 | 0.46 | 4.78   | 8.9E-06 | <i>CG31235</i>    | Intron             |
|                   | X   | 642549   | 0.13 | 6.92   | 9.3E-06 | <i>sdk</i>        | 3' UTR             |
|                   | 3L  | 21865887 | 0.11 | 7.27   | 1.1E-05 | <i>mub</i>        | Intron             |
|                   | X   | 16619471 | 0.33 | -4.94  | 1.2E-05 | <i>CG32572</i>    | Intron             |
|                   | 3L  | 10113202 | 0.16 | 6.34   | 9.4E-06 | <i>dpr6</i>       | Del (Intron - 5bp) |
|                   | 3L  | 12486916 | 0.30 | 5.43   | 4.4E-06 | <i>CG10657</i>    | Intron             |
|                   | 3L  | 7345189  | 0.25 | -5.31  | 1.3E-05 | <i>qm</i>         | Synonymous         |

|                 |    |          |      |        |         |                   |                     |
|-----------------|----|----------|------|--------|---------|-------------------|---------------------|
|                 | 2L | 16599284 | 0.14 | -6.72  | 1.3E-05 | CG42389           | Intron              |
|                 | 3L | 4016311  | 0.15 | 6.43   | 9.9E-06 | —                 | —                   |
| Number of Males | 3L | 7345189  | 0.25 | -5.90  | 4.4E-07 | <i>qm</i>         | Synonymous          |
|                 | 3L | 18174169 | 0.50 | -5.27  | 5.8E-07 | <i>hid</i>        | Intron              |
|                 | 2R | 8813359  | 0.29 | -5.62  | 8.8E-07 | <i>sug</i>        | Intron              |
|                 | 3R | 6693370  | 0.06 | -10.05 | 1.2E-06 | <i>SeIR</i>       | Intron              |
|                 | 2R | 10148146 | 0.14 | 7.03   | 2.3E-06 | <i>β4GalNAcTA</i> | 3' UTR              |
|                 | 3L | 6947531  | 0.15 | -6.71  | 2.5E-06 | CG10077           | Synonymous          |
|                 | X  | 2325264  | 0.39 | -4.84  | 4.3E-06 | —                 | —                   |
|                 | 2L | 14965948 | 0.18 | -6.21  | 5.2E-06 | CG42313           | Intron              |
|                 | 2R | 18403072 | 0.15 | -6.84  | 5.6E-06 | <i>px</i>         | Ins (Intron - 1bp)  |
|                 | 3L | 4675361  | 0.25 | -5.40  | 5.9E-06 | <i>axo</i>        | Intron              |
|                 | 3L | 4675401  | 0.26 | -5.35  | 6.1E-06 | <i>axo</i>        | Synonymous          |
|                 | X  | 11099804 | 0.05 | -10.59 | 6.2E-06 | —                 | —                   |
|                 | 3R | 14149420 | 0.46 | 4.72   | 6.6E-06 | CG31235           | Intron              |
|                 | 2L | 6232135  | 0.06 | -9.86  | 7.3E-06 | —                 | —                   |
|                 | 3R | 18523958 | 0.06 | 9.32   | 7.7E-06 | <i>Cyp6d4</i>     | Upstream (83bp)     |
|                 | 2L | 6232116  | 0.06 | -9.84  | 7.7E-06 | —                 | —                   |
|                 | X  | 2325239  | 0.38 | -4.68  | 9.9E-06 | —                 | —                   |
|                 | 3R | 6809568  | 0.05 | -10.31 | 1.1E-05 | CG34114           | Intron              |
| Female Mass     | 3L | 14106797 | 0.45 | -0.03  | 3.1E-07 | <i>Sox21b</i>     | Del (Intron - 12bp) |
|                 | 2L | 14413190 | 0.05 | -0.08  | 3.2E-07 | —                 | —                   |
|                 | 2L | 14413193 | 0.06 | -0.08  | 3.8E-07 | —                 | —                   |
|                 | 2L | 14413263 | 0.05 | -0.08  | 6.3E-07 | —                 | —                   |
|                 | 3R | 7783311  | 0.05 | -0.08  | 1.1E-06 | <i>Hsp70Ab</i>    | Upstream (946bp)    |
|                 | 2L | 3420660  | 0.32 | -0.04  | 1.3E-06 | <i>pgant2</i>     | Intron              |
|                 | 3L | 10798301 | 0.42 | -0.04  | 1.6E-06 | —                 | —                   |

|    |          |      |       |         |                 |                   |
|----|----------|------|-------|---------|-----------------|-------------------|
| 3L | 10798304 | 0.41 | -0.04 | 1.9E-06 | —               | —                 |
| 2R | 8519796  | 0.16 | -0.05 | 2.2E-06 | <i>muskelin</i> | Upstream (10bp)   |
| 2R | 20700416 | 0.27 | 0.04  | 2.3E-06 | —               | —                 |
| 3L | 10798314 | 0.41 | -0.04 | 2.4E-06 | —               | —                 |
| X  | 7894692  | 0.26 | -0.04 | 2.7E-06 | <i>Tbh</i>      | Intron            |
| 2L | 10356660 | 0.10 | -0.06 | 4.3E-06 | <i>CG5367</i>   | Upstream (63bp)   |
| 2R | 19783544 | 0.39 | -0.04 | 4.4E-06 | <i>CG17658</i>  | Synonymous        |
| 2R | 18428402 | 0.05 | -0.08 | 4.6E-06 | <i>px</i>       | Synonymous        |
| 3R | 10285026 | 0.05 | -0.08 | 4.7E-06 | <i>cv-c</i>     | Intron            |
| 2L | 7803209  | 0.32 | -0.04 | 5.6E-06 | <i>cdc14</i>    | Intron            |
| 2L | 16431797 | 0.13 | -0.05 | 6.1E-06 | <i>CG5888</i>   | Intron            |
| 2L | 6615656  | 0.06 | -0.07 | 6.3E-06 | <i>CG11050</i>  | Intron            |
| 2R | 20700303 | 0.25 | 0.04  | 6.4E-06 | —               | Del (7bp)         |
| 3L | 5507205  | 0.05 | -0.08 | 6.4E-06 | <i>Lkr</i>      | Intron            |
| 3L | 14106868 | 0.44 | -0.03 | 6.6E-06 | <i>Sox21b</i>   | Intron            |
| 2R | 13551054 | 0.30 | -0.04 | 6.7E-06 | —               | —                 |
| 3L | 10798335 | 0.41 | -0.04 | 6.8E-06 | —               | —                 |
| 3L | 21865641 | 0.08 | -0.06 | 6.9E-06 | <i>mub</i>      | Intron            |
| 2L | 10578180 | 0.08 | -0.06 | 6.9E-06 | <i>Trim9</i>    | Intron            |
| 2R | 16280567 | 0.35 | -0.03 | 7.0E-06 | —               | —                 |
| 3L | 16206075 | 0.16 | -0.05 | 7.4E-06 | <i>CG13073</i>  | Downstream (76bp) |
| 3L | 17541363 | 0.05 | -0.07 | 7.7E-06 | <i>Jon74E</i>   | Synonymous        |
| 3R | 1838453  | 0.07 | 0.07  | 7.8E-06 | <i>CG10280</i>  | Upstream (799bp)  |
| 3L | 16206105 | 0.16 | -0.05 | 8.0E-06 | <i>CG13073</i>  | Downstream (46bp) |
| 2R | 19814320 | 0.13 | -0.05 | 8.0E-06 | <i>CG2812</i>   | 3' UTR            |
| 2R | 14546992 | 0.23 | -0.04 | 8.2E-06 | <i>CG42306</i>  | 3' UTR            |
| 3L | 9215863  | 0.46 | -0.03 | 8.3E-06 | —               | —                 |

|                  |    |          |      |       |         |                 |                     |
|------------------|----|----------|------|-------|---------|-----------------|---------------------|
|                  | 3L | 16206101 | 0.17 | -0.04 | 8.5E-06 | <i>CG13073</i>  | Downstream (50bp)   |
|                  | 2R | 14224958 | 0.07 | -0.06 | 9.4E-06 | <i>sbb</i>      | Intron              |
|                  | 2R | 13551239 | 0.12 | -0.05 | 1.0E-05 | —               | —                   |
|                  | 2R | 16359945 | 0.12 | -0.05 | 1.0E-05 | <i>CG12484</i>  | Intron              |
|                  | 3L | 16206102 | 0.17 | -0.04 | 1.0E-05 | <i>CG13073</i>  | Downstream (49bp)   |
|                  | 2R | 20700409 | 0.29 | 0.04  | 1.2E-05 | —               | —                   |
|                  | 3R | 20156538 | 0.05 | -0.07 | 1.5E-05 | <i>CG5728</i>   | Non-synonymous      |
|                  | 3L | 7242967  | 0.39 | -0.03 | 1.5E-05 | <i>MED4</i>     | Non-synonymous      |
|                  | 3L | 10798320 | 0.40 | -0.03 | 1.5E-05 | —               | —                   |
|                  | 2R | 20393373 | 0.07 | -0.06 | 1.5E-05 | —               | —                   |
|                  | 3L | 7089314  | 0.09 | -0.06 | 2.6E-05 | <i>form3</i>    | Intron              |
| <b>Male Mass</b> | 2R | 7295988  | 0.13 | -0.04 | 2.8E-07 | <i>CG30026</i>  | Downstream (93bp)   |
|                  | 2L | 10356660 | 0.10 | -0.04 | 5.5E-07 | <i>CG5367</i>   | Upstream (63bp)     |
|                  | 2R | 17096829 | 0.08 | -0.04 | 6.0E-07 | <i>CG44245</i>  | Intron              |
|                  | 3R | 19368973 | 0.12 | -0.04 | 6.1E-07 | —               | —                   |
|                  | 2R | 8519796  | 0.16 | -0.04 | 6.1E-07 | <i>muskelin</i> | Upstream (10bp)     |
|                  | 3L | 10798314 | 0.41 | -0.03 | 7.0E-07 | —               | —                   |
|                  | 3L | 10798301 | 0.42 | -0.02 | 7.1E-07 | —               | —                   |
|                  | 2L | 21060741 | 0.16 | -0.03 | 7.2E-07 | <i>CG9265</i>   | Intron              |
|                  | 2R | 10631750 | 0.15 | -0.03 | 7.7E-07 | <i>CG12858</i>  | Intron              |
|                  | 2R | 17090919 | 0.18 | -0.03 | 7.8E-07 | <i>CG44245</i>  | Intron              |
|                  | 2R | 17090932 | 0.18 | -0.03 | 8.2E-07 | <i>CG44245</i>  | Intron              |
|                  | 2R | 17090956 | 0.18 | -0.03 | 8.2E-07 | <i>CG44245</i>  | Intron              |
|                  | 3R | 5437737  | 0.09 | -0.04 | 9.8E-07 | <i>CG8312</i>   | Ins (Intron - 24bp) |
|                  | 3L | 10798304 | 0.41 | -0.02 | 9.9E-07 | —               | —                   |
|                  | 2R | 10632503 | 0.06 | -0.05 | 1.1E-06 | <i>CG12858</i>  | Intron              |
|                  | 3L | 20829836 | 0.15 | -0.03 | 1.2E-06 | <i>CG3288</i>   | Synonymous          |

|    |          |      |       |         |               |                    |
|----|----------|------|-------|---------|---------------|--------------------|
| 2R | 17096825 | 0.09 | -0.04 | 1.2E-06 | CG44245       | Intron             |
| 2R | 10623262 | 0.06 | -0.05 | 1.6E-06 | —             | Del (3bp)          |
| 3L | 21865641 | 0.08 | -0.04 | 1.6E-06 | <i>mub</i>    | Intron             |
| 2R | 10631745 | 0.15 | -0.03 | 2.0E-06 | CG12858       | Intron             |
| 3L | 12849627 | 0.12 | -0.04 | 2.4E-06 | <i>Ent3</i>   | 3' UTR             |
| 3R | 10285026 | 0.05 | -0.05 | 2.4E-06 | <i>cv-c</i>   | Intron             |
| 3R | 5440058  | 0.10 | -0.04 | 2.5E-06 | CG8312        | Intron             |
| 3L | 10798335 | 0.41 | -0.02 | 2.6E-06 | —             | —                  |
| X  | 1553823  | 0.36 | -0.02 | 2.7E-06 | <i>br</i>     | 3' UTR             |
| 3L | 17541363 | 0.05 | -0.05 | 2.9E-06 | <i>Jon74E</i> | Synonymous         |
| X  | 1553824  | 0.36 | -0.02 | 3.0E-06 | <i>br</i>     | Ins (3'UTR - 10bp) |
| X  | 1553847  | 0.28 | -0.03 | 3.3E-06 | <i>br</i>     | 3' UTR             |
| 2R | 10631908 | 0.06 | -0.05 | 3.6E-06 | CG12858       | Intron             |
| 2L | 14413193 | 0.06 | -0.05 | 3.7E-06 | —             | —                  |
| 2R | 17096454 | 0.11 | -0.04 | 3.8E-06 | CG44245       | Intron             |
| 2R | 17096460 | 0.11 | -0.04 | 3.8E-06 | CG44245       | Intron             |
| 2R | 17270322 | 0.08 | -0.04 | 4.0E-06 | CG10795       | DOWNSTREAM         |
| 3R | 11212396 | 0.07 | -0.05 | 4.0E-06 | <i>Rbp</i>    | Intron             |
| 2L | 9486665  | 0.24 | -0.03 | 5.1E-06 | —             | —                  |
| 2R | 16280567 | 0.35 | -0.02 | 5.2E-06 | —             | —                  |
| 3R | 5437883  | 0.09 | -0.04 | 5.3E-06 | CG8312        | Intron             |
| 3L | 10798320 | 0.40 | -0.02 | 5.5E-06 | —             | —                  |
| 2L | 3420660  | 0.32 | -0.03 | 5.8E-06 | <i>pgant2</i> | Intron             |
| 2L | 14413263 | 0.05 | -0.05 | 5.9E-06 | —             | —                  |
| 3L | 14594907 | 0.05 | -0.05 | 6.1E-06 | —             | —                  |
| 2L | 14413190 | 0.05 | -0.05 | 6.1E-06 | —             | —                  |
| 3L | 1461884  | 0.07 | -0.04 | 6.2E-06 | <i>Ptp61F</i> | Intron             |

|    |          |      |       |         |                    |                    |
|----|----------|------|-------|---------|--------------------|--------------------|
| 2R | 19814320 | 0.13 | -0.03 | 6.9E-06 | CG2812             | 3' UTR             |
| 3L | 7632772  | 0.09 | -0.04 | 7.0E-06 | snoRNA:Me18S-A1806 | Upstream (45bp)    |
| 3R | 5434239  | 0.06 | -0.05 | 7.1E-06 | CG8312             | Del (Intron - 8bp) |
| 2L | 8006148  | 0.15 | -0.03 | 7.7E-06 | Spn28Dc            | Intron             |
| 3R | 10117707 | 0.06 | -0.04 | 8.0E-06 | CG12207            | Intron             |
| X  | 10026296 | 0.17 | -0.03 | 8.8E-06 | CG34104            | Intron             |
| X  | 8922745  | 0.07 | -0.04 | 9.5E-06 | CR43836            | Intron             |
| 3L | 14544608 | 0.12 | -0.03 | 1.1E-05 | CG9238             | Upstream (533bp)   |
| 3L | 7872997  | 0.11 | -0.04 | 1.3E-05 | CG32365            | Intron             |
| 2L | 15106388 | 0.10 | -0.04 | 1.4E-05 | —                  | —                  |
| 2R | 123566   | 0.05 | -0.05 | 1.6E-05 | IntS3              | Synonymous         |
| X  | 20395619 | 0.48 | -0.02 | 1.6E-05 | Tak1               | Del (5'UTR - 4bp)  |
| 3L | 4527187  | 0.05 | -0.05 | 1.7E-05 | Tie                | Intron             |
| 3L | 7632715  | 0.10 | -0.04 | 2.0E-05 | CG33275            | Downstream (42bp)  |
| 3R | 5436185  | 0.12 | -0.03 | 6.1E-05 | CG8312             | Intron             |

**Table S3. Variance proportion explained by each principal component and their loadings.**

|                       | PC1   | PC2  | PC3   | PC4   |
|-----------------------|-------|------|-------|-------|
| <b>St. dev</b>        | 1.69  | 0.97 | 0.39  | 0.28  |
| <b>Variance prop.</b> | 0.71  | 0.23 | 0.037 | 0.020 |
| <b>Number of ♀</b>    | -0.51 | 0.50 | -0.19 | 0.68  |
| <b>Number of ♂</b>    | -0.51 | 0.48 | 0.21  | -0.68 |
| <b>Mean ♀ Weight</b>  | 0.50  | 0.49 | 0.69  | 0.19  |
| <b>Mean ♂ Weight</b>  | 0.49  | 0.52 | -0.67 | -0.21 |
